# Supplementary material for: Mitigation of soil N2O emission by inoculation with a mixed culture of indigenous Bradyrhizobium diazoefficiens
Source: PubMed Central journal article supplement (PMC5025649; doi:10.1038/srep32869), 2016-09-16
Supplement: srep32869-s1.pdf [file srep32869-s1.pdf]

## Supplementary information

### Mitigation of soil N<sub>2</sub>O emission by inoculation with a mixed culture of indigenous *Bradyrhizobium diazoefficiens*

Hiroko Akiyama<sup>1</sup>, Yuko Takada Hoshino<sup>1</sup>, Manabu Itakura<sup>2,3</sup>, Yumi Shimomura<sup>1,4</sup>, Yong Wang<sup>1</sup>, Akinori Yamamoto<sup>1,5</sup>, Kanako Tago<sup>1</sup>, Yasuhiro Nakajima<sup>1,6</sup>, Kiwamu Minamisawa<sup>2\*</sup>, and Masahito Hayatsu<sup>1\*</sup>

The following authors contributed equally to this work:  
Hiroko Akiyama, Yuko Takada Hoshino and Manabu Itakura

1. Institute for Agro-Environmental Sciences, National Agriculture and Food Research Organization (NARO), 3-1-3, Kannondai, Tsukuba, Ibaraki 305-8604, Japan
2. Graduate School of Life Sciences, Tohoku University, 2-1-1 Katahira, Aoba-ku, Sendai, Miyagi 980-8577, Japan
3. Present address: Center for Ecological Evolutionary Developmental Biology, Kyoto Sangyo University, Motoyama, Kamigamo, Kita-Ku, Kyoto, 603-8555, Japan
4. Present address: Kyodo Milk Industry Co., Ltd, 20-1, Hirai, Hinode, Nishitama, Tokyo, 190-0182
5. Present address: Natural Science Research Unit, Tokyo Gakugei University, 4-1-1 Nukuikitamachi, Koganei, Tokyo, 184-8501, Japan
6. Advanced Analysis Center, NARO, 3-1-3, Kannondai, Tsukuba, Ibaraki 305-8604, Japan

\* Corresponding authors:

Masahito Hayatsu, Institute for Agro-Environmental Sciences, National Agriculture and Food Research Organization (NARO), 3-1-3, Kannondai, Tsukuba, Ibaraki 305-8604, Japan. Phone and fax: 81-298-8309. e-mail: hayatsu@affrc.go.jp

Kiwamu Minamisawa, Graduate School of Life Sciences, Tohoku University, 2-1-1 Katahira, Aoba-ku, Sendai, Miyagi 980-8577, Japan. Phone and fax: 81-22-217-5684. e-mail: kiwamu@ige.tohoku.ac.jp

## Methods

### *Culture of C110 and media used in field experiments*

A mixture of 63 *nosZ*<sup>+</sup> *Bradyrhizobium diazoefficiens* (C110) was cultured for five days at 30°C in flasks using modified AG medium<sup>1</sup> supplemented with 0.3 g L<sup>-1</sup> arabinose, 0.3 g L<sup>-1</sup> sodium gluconate, and 0.3 g L<sup>-1</sup> yeast extract at 30°C, with rotational shaking at 120 rpm. Cells were harvested by centrifugation at 10,000 ×g for 15 min at 4°C. The cell pellets were washed three times with sterile water and were suspended at a concentration of 10<sup>10</sup> cells mL<sup>-1</sup> in sterilized water. Soybean seeds were inoculated with the cells at 10<sup>10</sup> cells per seed. For the native rhizobia (control) treatment, 1 mL of soil suspension containing 0.1 g of the experimental field soil per seed was used as the inoculum.

### *Quantification of nodC gene of Bradyrhizobium diazoefficiens in the experimental field or orchard soil*

DNA was extracted from 500 mg soil, using a FastDNA Spin kit for soil (Qbiogene, Vista, CA, USA) according to previous reports<sup>2</sup>. Extracted soil DNA was purified using an UltraClean 15 DNA purification kit (MO BIO Laboratories, Solana Beach, CA, USA). The population size of *Bradyrhizobium diazoefficiens* was determined by SYBR green real-time PCR using the StepOne real-time PCR system (Applied Biosystems, Carlsbad, CA, USA) targeting *nodC* gene with specific primer set previously reported<sup>3</sup>. Each 20 µL PCR reaction contained 10 µL of Takara SYBR® Premix Ex Taq™, 0.4 µL of Rox (Takara Bio Inc., Shiga, Japan), 0.2 µM of each primer, and 2 µL of standard or unknown soil DNA. Thermal cycling included an initial denaturation step for 2 min at 94°C followed by 40 cycles of amplification (30 s at 94°C, 30 s at 57°C, and 30 s at 72°C). The generation of specific PCR products was confirmed by means of melting-curve analysis.

Standardization of templates was performed with a dilution series ( $10^7$ – $10^2$  copies  $\mu\text{L}^{-1}$ ) of the almost total length of *nodC* gene amplicons of *B. diazoefficiens* USDA110 generated with the primer set (nodCBjF and nodCBjR)<sup>4</sup>.

#### **Field experiment settings**

The study sites for the field experiments were located at NIAES, Japan (36°01'N, 140°07'E). A *nosZ*<sup>-</sup> dominant Andosol field (*nosZ*<sup>-</sup> = 98%, *nosZ*<sup>+</sup> = 2%) was divided into 6 m × 6 m plots. The experimental design was a randomized block design with 2 treatments × 5 replicates.

To increase the proportion of cotyledon emergence, soybean seeds were germinated in trays filled with moist vermiculite for one day. Then, soybean (*Glycine max* [L.] Merr., ver. Tachinagaha) seeds were planted in biodegradable Jiffy pots (Jiffy International AS, Kristiansand, Norway) filled with Andosol soil collected from an orchard located about 100 m away from the experimental field. The orchard soil was chosen because it has a lower native *B. diazoefficiens* population than, but soil properties similar to, the experimental field. Soybean seeds were inoculated with C110 (*nosZ*<sup>+</sup>) or 50 ml of soil from the experimental field (native) on June 26, 2013 and June 18, 2014, as described in the section **Culture of C110 and media for field experiments**. Soybean seedlings were then grown in a greenhouse under natural light and transplanted into the fields on July 3, 2013 and June 25, 2014. Basal fertilizer was applied as a compound fertilizer (30 kg N ha<sup>-1</sup>) one day before transplanting. Seedlings were transplanted with their biodegradable pots. Basal fertilizer was applied as a compound fertilizer (30 kg N ha<sup>-1</sup>, as ammonium-N, 50 kg ha<sup>-1</sup>; P<sub>2</sub>O<sub>5</sub>-equivalent, 50 kg ha<sup>-1</sup>; K<sub>2</sub>O-equivalent) one day before transplanting of the soybean pots. Soybean crops were harvested on October 17, 2013 and October 10, 2014, the aboveground residues were removed, and only the roots and stubble were left in the field.

#### **Nodule occupancy by *Bradyrhizobium diazoefficiens* with *nosZ* gene**

To determine the number of nodules and their occupancy by the inoculants, we collected three roots from each plot. We divided the root samples into two parts (root segments growing inside versus outside the Jiffy pot) and separately determined nodule number and occupancy for these two categories of roots. The nodule occupancy by strains with different alleles of the *nosZ* gene was examined using eight nodules excised from each of the two categories of plant roots. Nodules were crushed using sterilized toothpicks and suspended in 40  $\mu\text{L}$  of sterilized water. We then added 50  $\mu\text{L}$  of BL buffer (40 mM Tris, 1 mM EDTA-Na, 1% Tween 20, 0.5% Nonidet P-40, pH 8.0) and 0.3 U of proteinase K (30 U mg<sup>-1</sup>) to the bacteroid cell suspension. Cell mixtures were incubated at 60°C for 20 min and then at 95°C for 5 min. After centrifugation (2800 ×g, 15 min., 20°C), the supernatants were used as PCR templates.

The *nosZ*-specific primer pair and previously reported<sup>3</sup> primer pairs specific to *nodC* of *B. diazoefficiens* or *B. elkanii* were used to detect *B. diazoefficiens nosZ*. For simultaneous detection of *nodC* of *B. diazoefficiens* and *nosZ*, two pairs of primers targeting them were used in a single reaction tube. Multiplex PCR was performed according to the manual of the TaKaRa multiplex PCR kit (TaKaRa, Shiga, Japan). The multiplex PCR reaction was performed in a total volume of 20  $\mu\text{L}$  containing 10  $\mu\text{L}$  of Mix 2, 0.1  $\mu\text{L}$  of Mix 1, 1  $\mu\text{L}$  of DNA template, and 0.2  $\mu\text{M}$  each primer. PCR reactions were performed on the GeneAmp® PCR System 9700 (Applied Biosystems, Foster City, CA, USA) with initial denaturation at 94°C for 1 min and 30 cycles of denaturation at 94°C for 30 s, annealing at 57°C for 90 s, and elongation at 72°C for 90 s. The PCR products were size separated on 4% NuSieve 3:1 agarose gel (Lonza, Rockland, ME, USA) and stained with ethidium bromide. An UV transilluminator and photograph system with an analyst computer program was employed for visualization. For samples showing no *nodC* band of *B. diazoefficiens*, another PCR was performed with primer pairs specific to *nodC* of *B. elkanii*. The PCR program was an initial step of 94°C for 2 min, followed by 30 cycles of 94°C for 30 s, 65°C for 30 s, and 72°C for 30 s. The PCR mixture (total volume of 20  $\mu\text{L}$ ) contained 2  $\mu\text{L}$  of 10× buffer, 0.2 mM of each dNTP, 0.1  $\mu\text{L}$  of ExTaq Hot Start Version (Takara), 1  $\mu\text{L}$  of DNA template, and 0.2  $\mu\text{M}$  of each primer.

### ***Expression analysis of the nirK and nosZ gene***

After the incubation experiments, nodules were quickly frozen in liquid nitrogen and stored at  $-80^{\circ}\text{C}$  until analysis. Total RNA was extracted from 400 mg of nodules using the TRIzol reagent (Invitrogen, Carlsbad, CA, USA), following the manufacturer's protocol. RNA was treated with TurboDNase (Ambion, Austin, TX, USA) and purified using the RNeasy Mini Kit (Qiagen GmbH, Hilden, Germany). Total RNA was quantified by microspectrophotometry (Nano-Drop Technologies, Inc.). RNA integrity was measured using an Agilent 2100 Bioanalyzer (Agilent Technologies, Inc.). RNA with a RNA integrity number (RIN) above 7.0 was used for real-time qRT-PCR. The absence of contaminating genomic DNA after DNase treatment was verified by PCR analysis using previously reported<sup>3</sup> specific primers for the *sigA* genes.

Total RNA was subjected to qRT-PCR using a Prime-Script RT reagent kit (TaKaRa). The RT reaction was performed in 20  $\mu\text{L}$  reaction mixtures that contained 8  $\mu\text{L}$  RNA, 4  $\mu\text{L}$  of 5 $\times$  PrimeScript<sup>®</sup> Buffer (for Real Time analysis), 1  $\mu\text{L}$  of PrimeScript<sup>®</sup> RT Enzyme Mix I, 1  $\mu\text{L}$  of random 6-mers (100  $\mu\text{M}$ ), and 5  $\mu\text{L}$  of ddH<sub>2</sub>O (TaKaRa). The RT reaction protocol included incubation at  $37^{\circ}\text{C}$  for 15 min and  $85^{\circ}\text{C}$  for 5 s. The qPCR was performed in Step One plus (Applied Biosystems) using SYBR Premix Ex TaqII (TaKaRa Biotechnology) and specific primers for the *nosZ* (*nosZ-1f* and *nosZ-1r*)<sup>3</sup>, *nirK* (B\_nirK-f, 5'-ATGGCGACTATGTCTGGGAG-3'; B\_nirK-r, 5'-CGTGACATAGGCGTAGATGC-3') and *sigA* genes.

Each 20  $\mu\text{L}$  PCR reaction contained 10  $\mu\text{L}$  of Takara SYBR<sup>®</sup> Premix Ex Taq<sup>™</sup> II, 0.4  $\mu\text{L}$  of Rox (Takara Bio Inc., Shiga, Japan), 0.2  $\mu\text{M}$  of each primer and 2  $\mu\text{L}$  of standard or unknown DNA. Thermal cycling included an initial denaturation step for 2 min at  $94^{\circ}\text{C}$  followed by 40 cycles of amplification (15 s at  $94^{\circ}\text{C}$ , 30 s at  $55^{\circ}\text{C}$ , and 30 s at  $72^{\circ}\text{C}$ ). The generation of specific PCR products was confirmed by means of melting-curve analysis. Standardization of templates for each gene was performed with a dilution series ( $10^7$ – $10^2$  copies  $\mu\text{L}^{-1}$ ) of *nosZ*, *nirK*, and *sigA* gene amplicons of *B. diazoefficiens* USDA110 generated with the same qPCR primers.

### ***Measurements of N<sub>2</sub>O flux***

N<sub>2</sub>O emission was measured every two days during the cultivation and nodule decomposition period (from July 2, 2013 to January 26, 2014 and June 7, 2014 to December 26, 2014) and every four days during the remainder of the period using automated gas sampling systems with automatically closing chambers (90  $\times$  90 cm; 60 cm or 110 cm in height, depending on plant height)<sup>5</sup>. Each chamber was closed for 1 h starting at 16:00 h on the measurement day. We collected gas samples in evacuated 15 mL vials from the atmosphere inside each chamber at 0, 30, and 60 min after closure of the chamber. Sampling was performed from 16:00 to 17:00 h to obtain the daily average flux, and the timing was adapted from a previous study of diel changes in the N<sub>2</sub>O flux in a nearby field<sup>6</sup>. The gas samples were then analyzed to determine the N<sub>2</sub>O concentration using a gas chromatography equipped with a CH<sub>4</sub>-doped <sup>63</sup>Ni electron capture detector at  $340^{\circ}\text{C}$  (GC-2014, Shimadzu, Kyoto, Japan) using a headspace auto-sampler (HS-2B, Shimadzu). The headspace auto-sampler was modified for trace gas analysis by replacement of the original syringe with a 2 mL gas-tight syringe (Pressure-Lok series A, VICI Precision Sampling, Baton Rouge, LA, USA) and by removal of the original heating unit. N<sub>2</sub> was used as the carrier gas. N<sub>2</sub>O emission was calculated from the rate of increase in N<sub>2</sub>O concentration between the three measured concentrations. Standard gas (0.3, 0.5, 1, 2.5, and 5 ppm N<sub>2</sub>O) were analyzed before and after daily analyses of the samples. The coefficients of variation for repeated analyses of the standard gas (N<sub>2</sub>O, 0.5 ppm) were 0.48% for N<sub>2</sub>O ( $n = 40$ ). The fluxes were calculated from the linear increase or decrease of the gas concentrations during the sampling period.

### ***Bulk soil sampling and mineral nitrogen measurements***

Soil samples were taken periodically in triplicate. Surface soil (0 to 5 cm) was randomly collected from five points in each plot and mixed together in a plastic bag to produce a composite sample. The bulk soil samples were immediately transferred to the laboratory for analysis. Samples of fresh soil (10 g) were extracted with 100 mL of KCl solution (100 g KCl L<sup>-1</sup>). We used the copper-cadmium reduction and diazotization method to determine the NO<sub>3</sub><sup>-</sup> content and used the indophenol blue method to analyze the NH<sub>4</sub><sup>+</sup> content using a TRRACS continuous-flow analyzer (Bran+Luebbe,

Norderstedt, Germany).

***Rhizosphere soil, root, and nodule mineral nitrogen measurement***

After the incubation experiment for N<sub>2</sub>O production rates (Methods in the main text), rhizosphere soil, root, and nodule samples were extracted with KCl solution (1:10 ratio; 100 g KCl L<sup>-1</sup>). NO<sub>3</sub><sup>-</sup> and NH<sub>4</sub><sup>+</sup> contents were measured using with a TRRACS continuous-flow analyzer (Bran+Luebbe, Norderstedt, Germany).

***Statistical analysis***

All statistical analysis was conducted using version 18.0 of the PASW statistics software (SPSS Inc., New York, NY, USA). N<sub>2</sub>O production rate and the proportion of nodule occupancy by the inoculants were evaluated using *t*-tests (two-sided). Normal distribution was assumed. The homogeneity of variance was tested by Levene's test. The effect of *nosZ+* on N<sub>2</sub>O emission based on two years of field data was evaluated using a mixed linear model.

**Table S1. *Bradyrhizobium diazoefficiens* strains and cells mixture used in this study.**

| Strains and mixture                          | ITS accession number | Source*             | Reference           |
|----------------------------------------------|----------------------|---------------------|---------------------|
| <i>Bradyrhizobium diazoefficiens</i> strains |                      |                     |                     |
| HK1-31                                       | AB983868             | Hokkaido (Fluvisol) | Shiina et al. 2014# |
| HK1-32                                       | AB983869             | Hokkaido (Fluvisol) | Shiina et al. 2014  |
| HK2-8                                        | AB983876             | Hokkaido (Fluvisol) | Shiina et al. 2014  |
| HK3-7                                        | AB983881             | Hokkaido (Fluvisol) | Shiina et al. 2014  |
| HK3-13                                       | AB983884             | Hokkaido (Fluvisol) | Shiina et al. 2014  |
| HK3-21                                       | AB983885             | Hokkaido (Fluvisol) | Shiina et al. 2014  |
| HK3-25                                       | AB983886             | Hokkaido (Fluvisol) | Shiina et al. 2014  |
| KS1-16                                       | AB983952             | Miyagi (Gleysol)    | Shiina et al. 2014  |
| KS2-2                                        | AB983956             | Miyagi (Gleysol)    | Shiina et al. 2014  |
| KS2-3                                        | AB983957             | Miyagi (Gleysol)    | Shiina et al. 2014  |
| YM1-1                                        | AB983962             | Yamagata (Gleysol)  | Shiina et al. 2014  |
| YM1-3                                        | AB983964             | Yamagata (Gleysol)  | Shiina et al. 2014  |
| YM1-4                                        | AB983965             | Yamagata (Gleysol)  | Shiina et al. 2014  |
| YM1-5                                        | AB983966             | Yamagata (Gleysol)  | Shiina et al. 2014  |
| YM1-6                                        | AB983967             | Yamagata (Gleysol)  | Shiina et al. 2014  |
| YM1-7                                        | AB983968             | Yamagata (Gleysol)  | Shiina et al. 2014  |
| YM2-2                                        | AB983972             | Yamagata (Gleysol)  | Shiina et al. 2014  |
| YM2-3                                        | AB983973             | Yamagata (Gleysol)  | Shiina et al. 2014  |
| YM2-5                                        | AB983974             | Yamagata (Gleysol)  | Shiina et al. 2014  |
| YM2-7                                        | AB983976             | Yamagata (Gleysol)  | Shiina et al. 2014  |
| YM3-2                                        | AB983980             | Yamagata (Gleysol)  | Shiina et al. 2014  |
| YM3-4                                        | AB983981             | Yamagata (Gleysol)  | Shiina et al. 2014  |
| NG1                                          | AB983989             | Niigata (Gleysol)   | Shiina et al. 2014  |
| NG2                                          | AB983990             | Niigata (Gleysol)   | Shiina et al. 2014  |
| NG5                                          | AB983993             | Niigata (Gleysol)   | Shiina et al. 2014  |
| TS1-1                                        | AB983995             | Ibaraki (Gleysol)   | Shiina et al. 2014  |
| TS1-2                                        | AB983996             | Ibaraki (Gleysol)   | Shiina et al. 2014  |
| TS1-3                                        | AB983997             | Ibaraki (Gleysol)   | Shiina et al. 2014  |
| TS1-4                                        | AB983998             | Ibaraki (Gleysol)   | Shiina et al. 2014  |
| TS1-5                                        | AB983999             | Ibaraki (Gleysol)   | Shiina et al. 2014  |
| TS1-6                                        | AB984000             | Ibaraki (Gleysol)   | Shiina et al. 2014  |
| TS2-1                                        | AB984001             | Ibaraki (Gleysol)   | Shiina et al. 2014  |
| TS2-10                                       | AB984005             | Ibaraki (Gleysol)   | Shiina et al. 2014  |
| TS3-4                                        | AB984007             | Ibaraki (Gleysol)   | Shiina et al. 2014  |
| TS3-5                                        | AB984008             | Ibaraki (Gleysol)   | Shiina et al. 2014  |
| TS3-6                                        | AB984009             | Ibaraki (Gleysol)   | Shiina et al. 2014  |
| TS3-7                                        | AB984010             | Ibaraki (Gleysol)   | Shiina et al. 2014  |
| TS3-19                                       | AB984015             | Ibaraki (Gleysol)   | Shiina et al. 2014  |
| TS4-125                                      | AB984019             | Ibaraki (Andosol)   | Shiina et al. 2014  |

|        |          |                     |                    |
|--------|----------|---------------------|--------------------|
| FK2-2  | AB984034 | Fukuoka (Gleysol)   | Shiina et al. 2014 |
| FK2-3  | AB984035 | Fukuoka (Gleysol)   | Shiina et al. 2014 |
| FK2-4  | AB984036 | Fukuoka (Gleysol)   | Shiina et al. 2014 |
| FK2-6  | AB984038 | Fukuoka (Gleysol)   | Shiina et al. 2014 |
| KM1-1  | AB984045 | Kumamoto (Gleysol)  | Shiina et al. 2014 |
| KM1-2  | AB984046 | Kumamoto (Gleysol)  | Shiina et al. 2014 |
| KM1-3  | AB984047 | Kumamoto (Gleysol)  | Shiina et al. 2014 |
| KM1-5  | AB984049 | Kumamoto (Gleysol)  | Shiina et al. 2014 |
| KM1-6  | AB984050 | Kumamoto (Gleysol)  | Shiina et al. 2014 |
| KM2-5  | AB984054 | Kumamoto (Gleysol)  | Shiina et al. 2014 |
| KM2-6  | AB984055 | Kumamoto (Gleysol)  | Shiina et al. 2014 |
| KM2-7  | AB984056 | Kumamoto (Gleysol)  | Shiina et al. 2014 |
| KM2-8  | AB984057 | Kumamoto (Gleysol)  | Shiina et al. 2014 |
| KM4-1  | AB984069 | Kumamoto (Gleysol)  | Shiina et al. 2014 |
| KM4-2  | AB984070 | Kumamoto (Gleysol)  | Shiina et al. 2014 |
| MY1-2  | AB984078 | Miyazaki (Gleysol)  | Shiina et al. 2014 |
| MY1-3  | AB984079 | Miyazaki (Gleysol)  | Shiina et al. 2014 |
| MY1-4  | AB984080 | Miyazaki (Gleysol)  | Shiina et al. 2014 |
| KG1-5  | AB984092 | Kagoshima (Gleysol) | Shiina et al. 2014 |
| KG1-11 | AB984097 | Kagoshima (Gleysol) | Shiina et al. 2014 |
| KG1-13 | AB984098 | Kagoshima (Gleysol) | Shiina et al. 2014 |
| KG2-5  | AB984100 | Kagoshima (Andosol) | Shiina et al. 2014 |
| KG2-6  | AB984101 | Kagoshima (Andosol) | Shiina et al. 2014 |
| KG2-73 | LC101818 | Kagoshima (Andosol) | Shiina et al. 2014 |

*Bradyrhizobium diazoefficiens* cells mixture  
C110

-

Cells mixture of 63 *B.*  
*diazoefficiens* strains

This study

\* Source of *B. diazoefficiens* strains indicates isolated prefecture in Japan. The word in parentheses indicates soil types of isolated fields.

# Shiina et al. 2014 (ref.7)

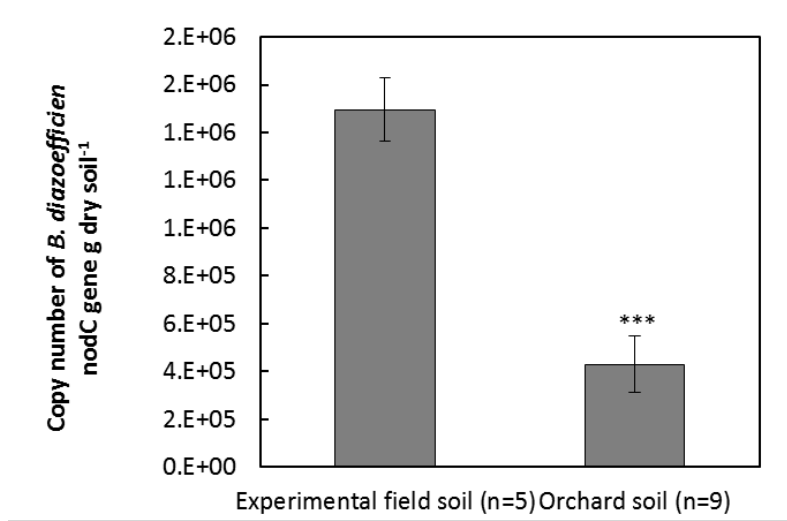

**Supplemental Fig. S1. nodC copy numbers in the Andosol experimental field soil and the nearby Andosol orchard soil that was used for soybean seedling pots.**

Values are means  $\pm$  SD.

\*\*\*  $P < 0.001$

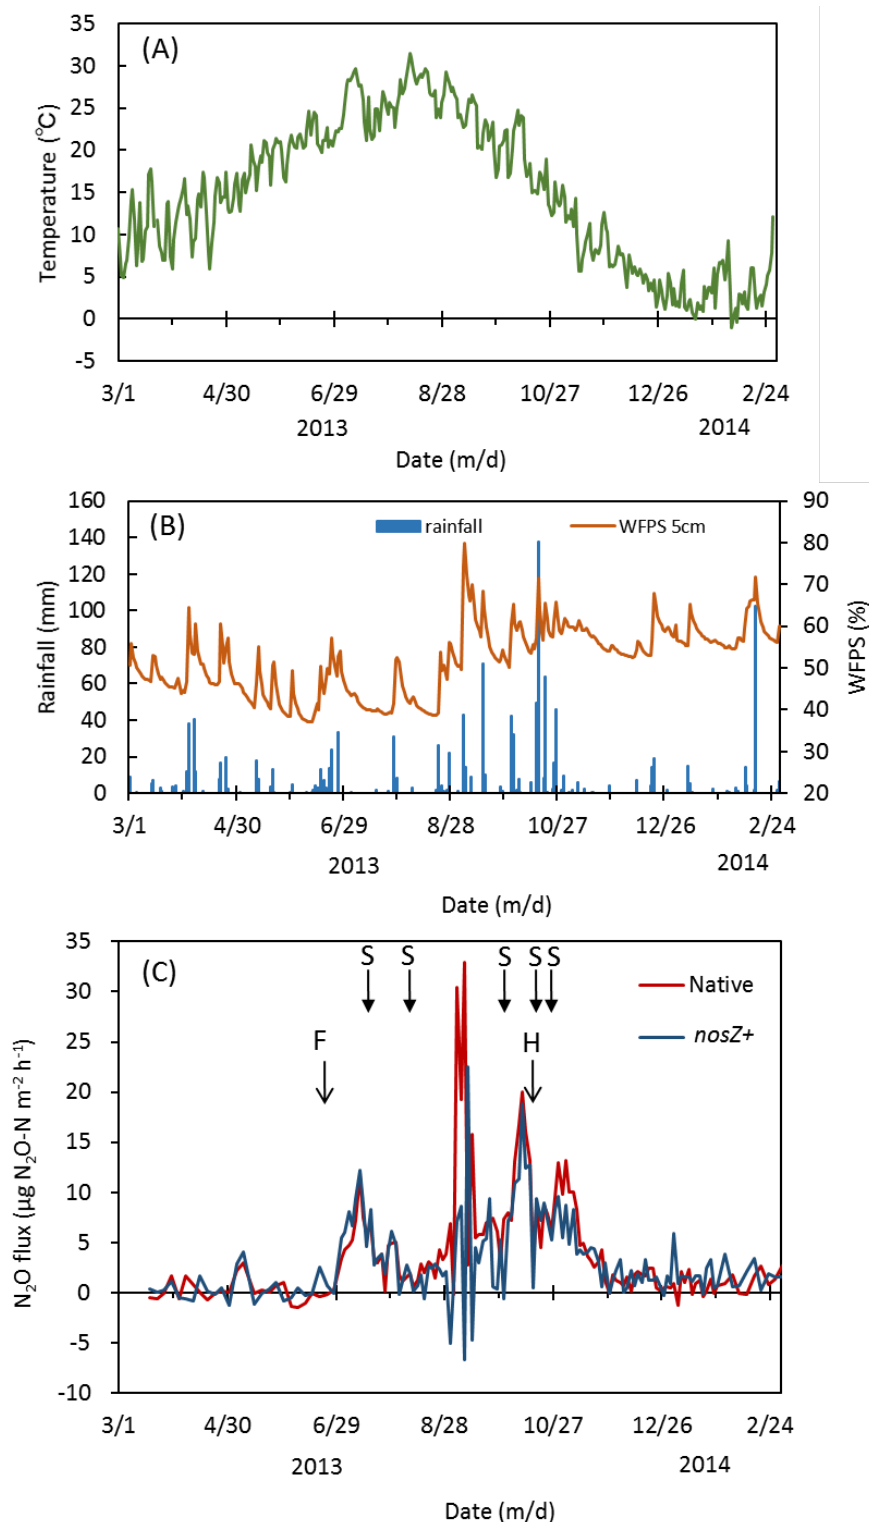

**Supplementary Fig. S2. Seasonal changes of (A) air temperature, (B) rainfall and water-filled pore space (WFPS) at a depth of 5 cm, and (C) N<sub>2</sub>O fluxes from an Andosol field in the 2013 experiment.** Soybean seeds were inoculated at sowing with a mixed culture of *B. diazoefficiens* strains (*nosZ*<sup>+</sup>) or native strains (Native; *nosZ*<sup>-</sup> dominant) (n = 5). F, fertilizer application; H, harvesting of soybean; S: sampling for N<sub>2</sub>O production rates of soil, roots, and nodules.



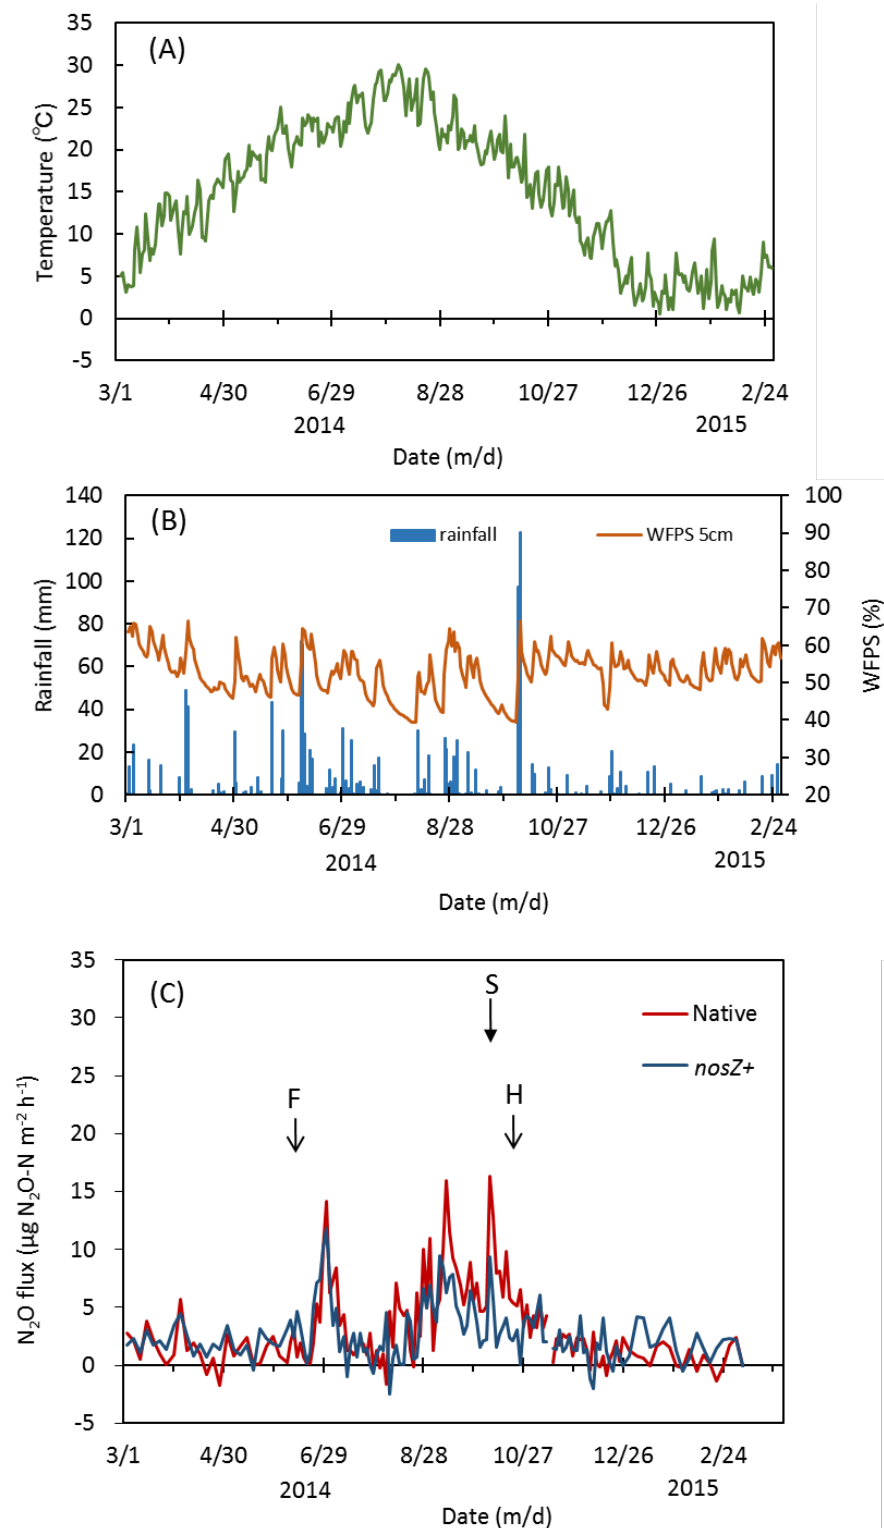

**Supplementary Fig. S3. Seasonal changes of (A) air temperature, (B) rainfall and water-filled pore space (WFPS) at a depth of 5 cm, and (C) N<sub>2</sub>O fluxes from an Andosol field in the 2014 experiment.** Soybean seeds were inoculated at sowing with a mixed culture of *B. diazoefficiens* strains (*nosZ*+) or native strains (Native; *nosZ*- dominant) (n = 5). F, fertilizer application; H, harvesting of soybean; S: sampling for N<sub>2</sub>O production rates of soil, roots, and nodules.

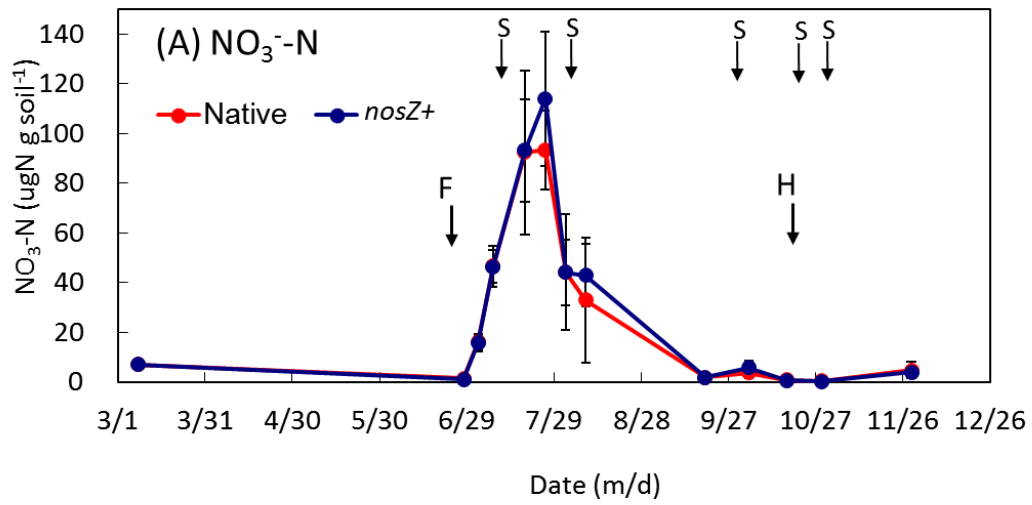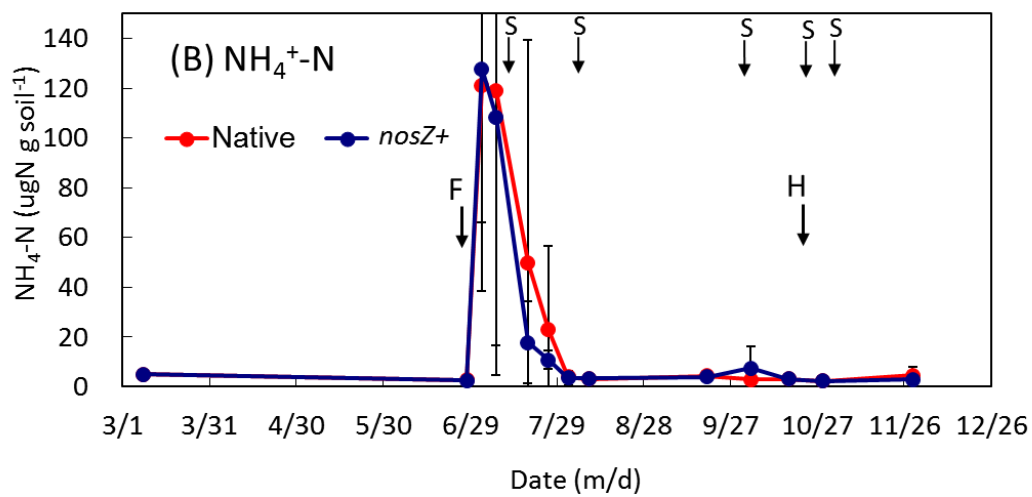

**Supplementary Fig. S4. Seasonal changes of soil  $\text{NO}_3^-$  (A) and  $\text{NH}_4^+$  (B) contents during the field experiment in 2013.** Soybean seeds were inoculated at sowing with a mixed culture of *B. diazoefficiens* strains (*nosZ+*) or native strains (Native; *nosZ-* dominant). F, fertilizer application; H, soybean harvest; S: sampling for  $\text{N}_2\text{O}$  production rates of soil, roots, and nodules. Values are means  $\pm$  SD ( $n = 5$ ).

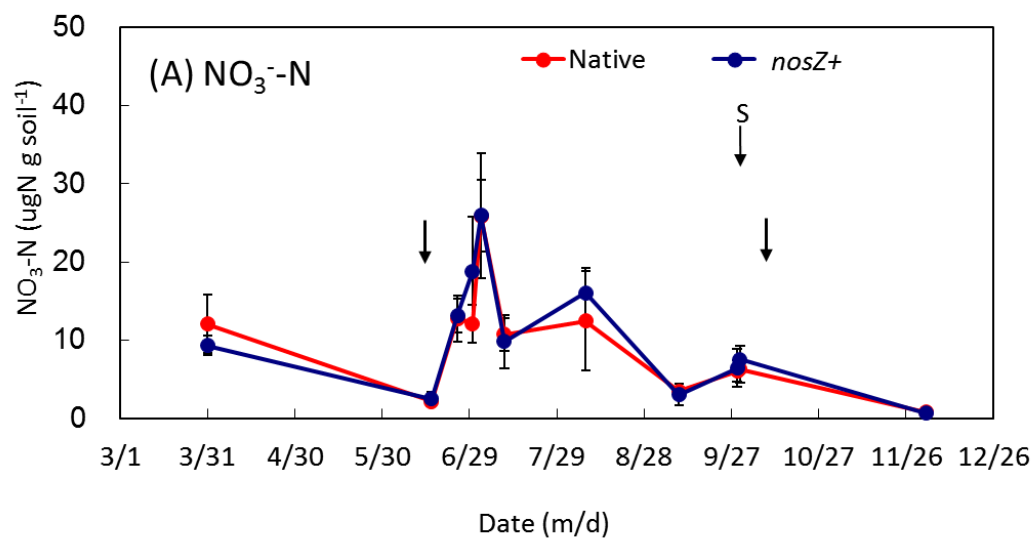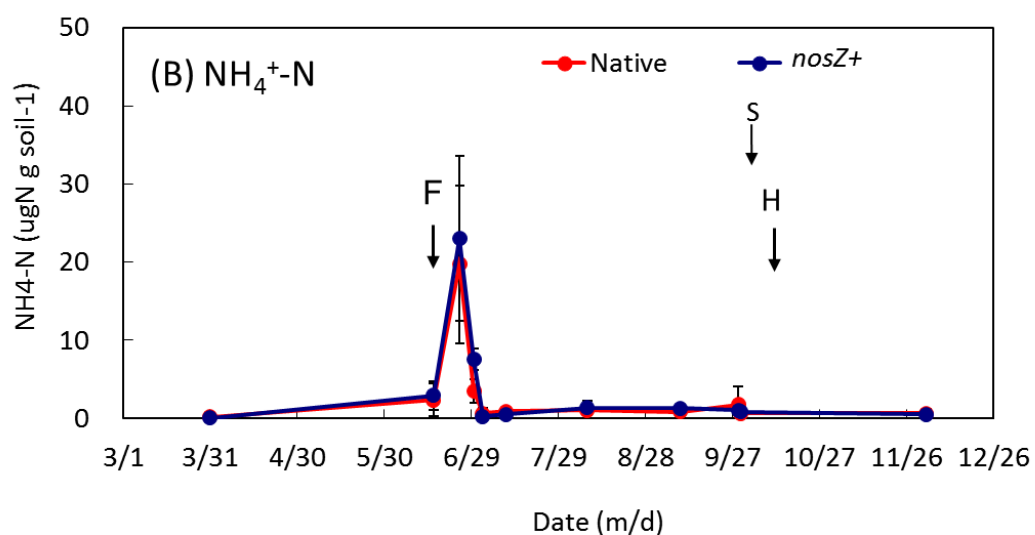

**Supplementary Fig. S5. Seasonal changes of soil (A)  $\text{NO}_3^-$  and (B)  $\text{NH}_4^+$  content in the field experiment in 2014.** Soybean seeds were inoculated at sowing with a mixed culture of *B. diazoefficiens* strains (*nosZ+*) or native strains (Native; *nosZ-* dominant). F, fertilizer application; H, soybean harvest; S: sampling for  $\text{N}_2\text{O}$  production rates of soil, roots, and nodules. Values are means  $\pm$  SD ( $n = 5$ ).

## References

1. Sadowsky M. J., Tully R. E., Cregan P. B. & Keyser H. H. Genetic diversity in *Bradyrhizobium japonicum* serogroup 123 and its relation to genotype-specific nodulation of soybean. *Appl. Environ. Microbiol.* **53**, 2624-2630 (1987).
2. Hoshino, Y. T. & Matsumoto, N. An Improved DNA Extraction Method Using Skim Milk from Soils That Strongly Adsorb DNA. *Microbes Environ.* **19**, 13-19 (2004).
3. Itakura, M. et al., Mitigation of nitrous oxide emissions from soils by *Bradyrhizobium japonicum* inoculation, *Nature Clim. Change* **3**, 208-212 (2013).
4. Barcellos, F. G. et al. Evidence of Horizontal Transfer of Symbiotic Genes from a *Bradyrhizobium japonicum* Inoculant Strain to Indigenous Diazotrophs *Sinorhizobium (Ensifer) fredii* and *Bradyrhizobium elkanii* in a Brazilian Savannah Soil. *Appl. Environ. Microbiol.* **73**, 2635–2643 (2007).
5. Akiyama, H. et al. Automated sampling system for long-term monitoring of nitrous oxide and methane fluxes from soils. *Soil Sci. Plant Nutri.* **55**, 435-440 (2009).
6. Akiyama H. & Tsuruta H. Effect of organic matter application on N<sub>2</sub>O, NO, and NO<sub>2</sub> fluxes from an Andisol field, *Global Biogeochemical Cycles*, 17, DOI: 10.1029/2002GB002016 (2003).
7. Shiina Y. et al. Correlation between soil type and N<sub>2</sub>O reductase genotype (*nosZ*) of indigenous soybean bradyrhizobia: *nosZ*-minus populations are dominant in Andosols. *Microbes Environ.* **29**, 420-426
